# Supplementary material for: Precise spatial structure impacts antimicrobial susceptibility of S. aureus in polymicrobial wound infections
Source: PubMed Central journal article supplement (PMC9907066; doi:10.1073/pnas.2212340119), 2022-12-15
Supplement: pnas.2212340119.sapp.pdf [file pnas.2212340119.sapp.pdf]

## **Supporting Information for**

## Precise spatial structure impacts antimicrobial susceptibility of *S. aureus* in polymicrobial wound infection

Carolyn B. Ibberson, Juan P. Barraza, Avery L. Holmes, Pengbo Cao, and Marvin Whiteley

Correspondence may be addressed to Carolyn B. Ibberson or Marvin Whiteley

Email: carolyn.ibberson@ou.edu

Email: mwhiteley3@gatech.edu

### **This PDF file includes:**

Figures S1 to S5  
Tables S1 and S2  
SI References

Co-WT

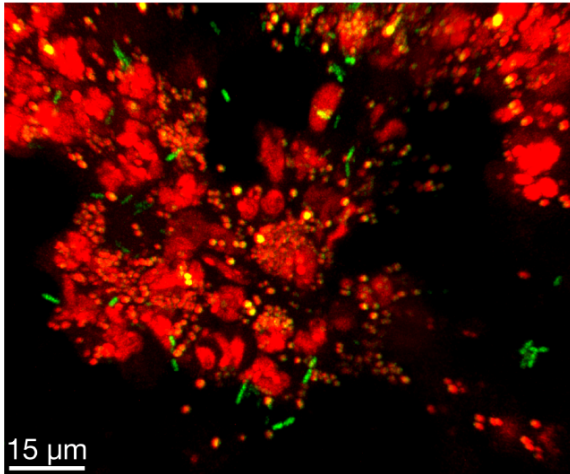

Co- $\Delta pq s L$

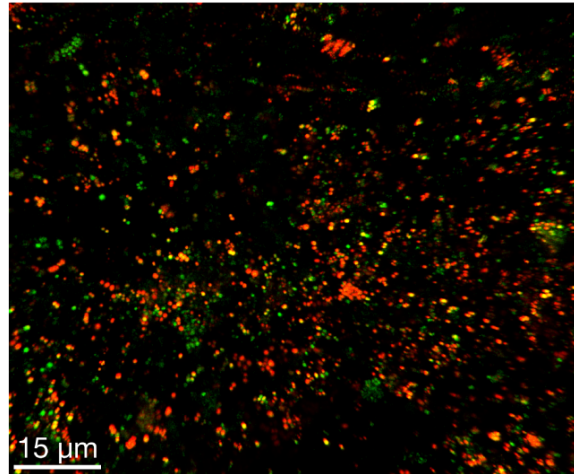

**Fig. S1. Images of co-infected murine wounds.** Confocal images of murine wounds co-infected with *S. aureus* and *P. aeruginosa* PA14 WT (Co-WT) or the isogenic  $\Delta pq s L$  mutant (Co- $\Delta pq s L$ ) at 4 days post-infection. *S. aureus* constitutively expresses DsRed and *P. aeruginosa* constitutively express GFP. Host cells (blue) were stained with NucBlue in the mounting medium.

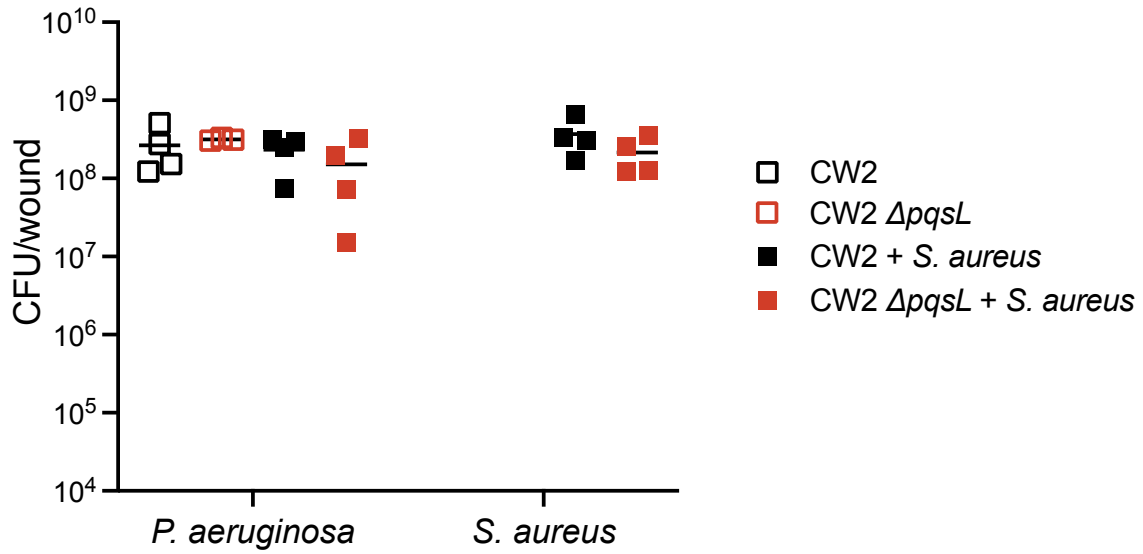

**Fig. S2. *S. aureus* and a *P. aeruginosa* wound clinical isolate co-exist in a murine surgical wound model.** Colony forming units of *P. aeruginosa* CW2-B1 or *S. aureus* in mono- (open squares) and co-infection (closed squares) with wildtype (black), or CW2-B1  $\Delta pqsL$  (red) in the murine wound model. Each symbol indicates a single animal infection.

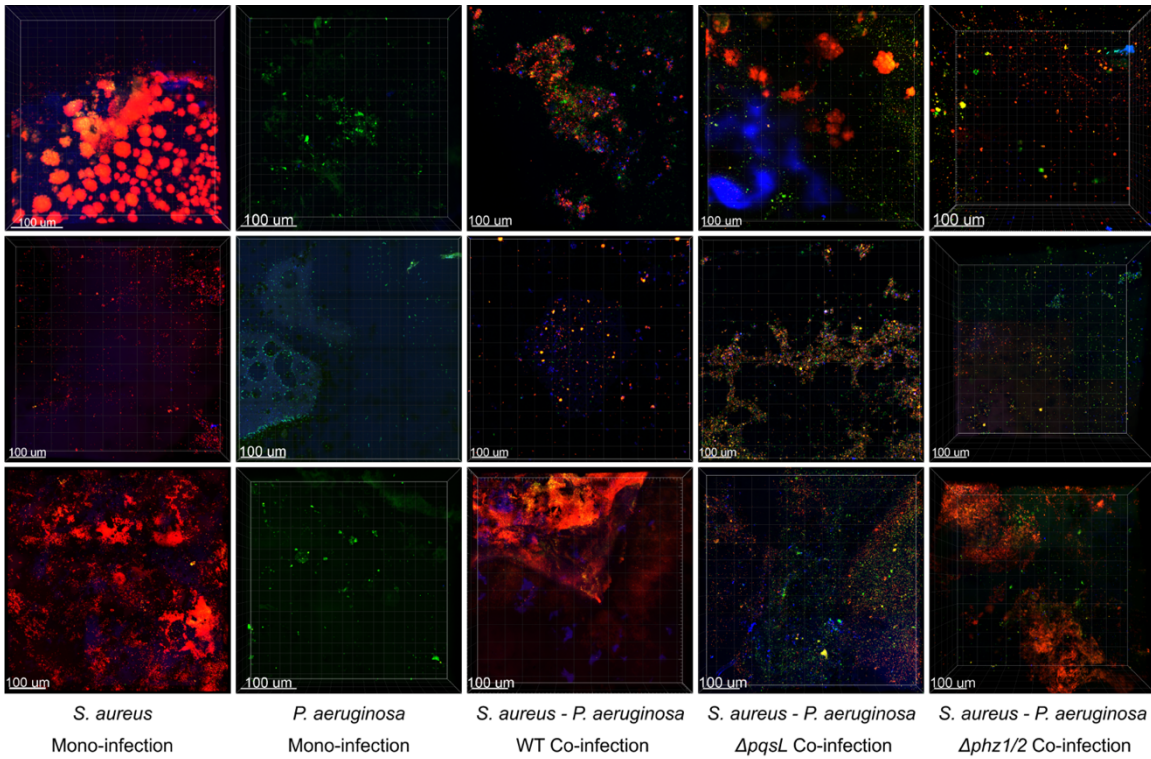

**Fig S3. Patchy distribution of *S. aureus* and *P. aeruginosa* within wounds.** *S. aureus* (red), *P. aeruginosa* (green), and host cells (blue) are shown. Images are representative of the range of observed spatial organization.

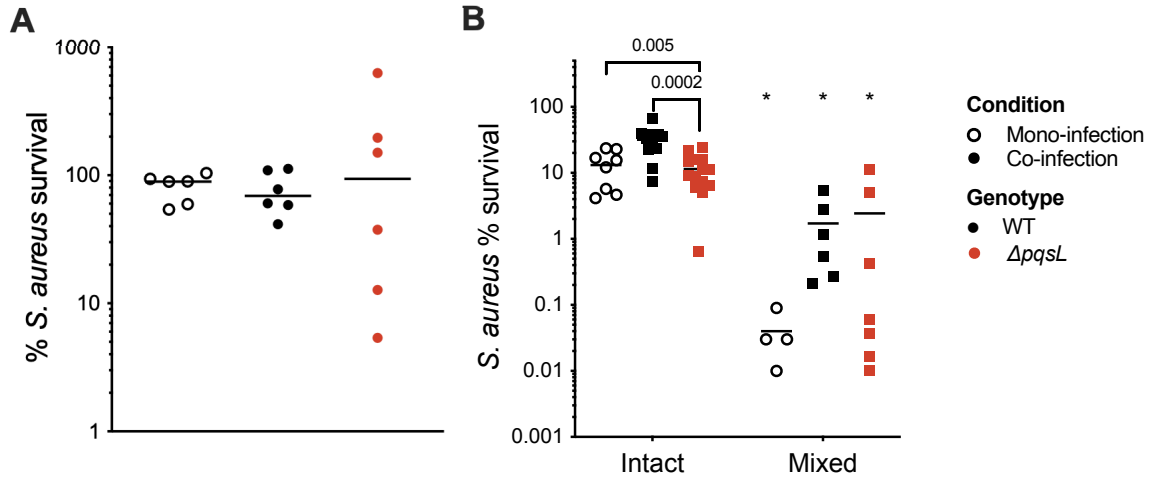

**Fig. S4. *S. aureus* vancomycin and aminoglycoside tolerance in intact and mixed wounds.** **A)** Percent survival of *S. aureus* to vancomycin in intact (structured) wounds compared to untreated portions of the same wound. Mono-infection is shown with open circles, co-infection with WT *P. aeruginosa* with closed circles, and co-infection with *P. aeruginosa*  $\Delta pqsL$  with red circles. **B)** Percent survival of *S. aureus* to gentamicin in intact (structured) or mixed (homogenized) wounds compared to untreated portions of the same wound. Mono-infection is shown with open circles, co-infection with WT *P. aeruginosa* CW2-B1 with black squares, and co-infection with *P. aeruginosa* CW2-B1  $\Delta pqsL$  with red squares. All P-values were determined by a Mann-Whitney test, asterisks indicate  $P < 0.01$  comparing Intact and Mixed wounds of each condition. Each symbol indicates a single animal infection.

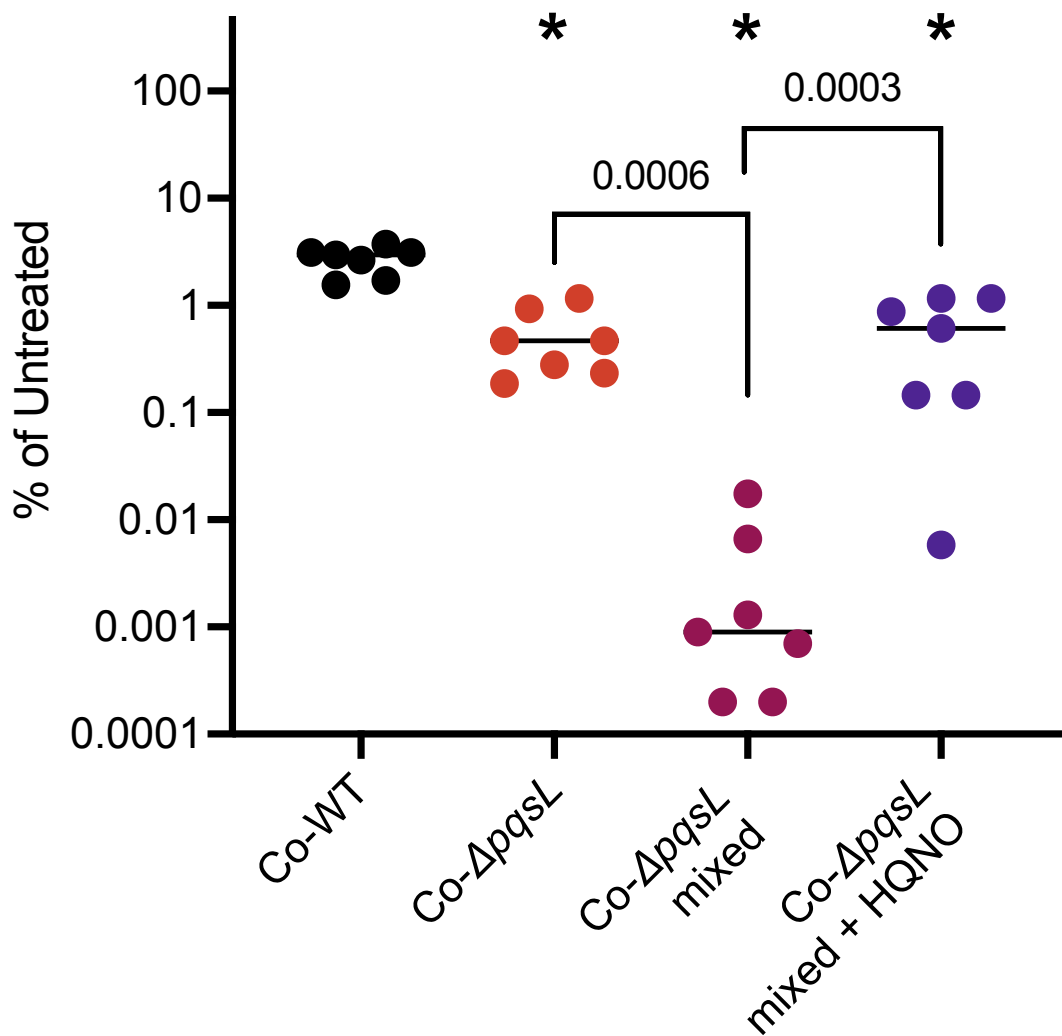

**Fig. S5. *S. aureus* tolerance to the aminoglycoside tobramycin during co-culture in an in vitro CF infection model.** Percent survival of *S. aureus* to tobramycin in vitro compared to untreated cultures. Co-infection with WT *P. aeruginosa* PA14 is shown with black circles (Co-WT), co-infection with *P. aeruginosa* PA14  $\Delta pqsL$  with red circles (Co- $\Delta pqsL$ ), co-infection with  $\Delta pqsL$  that has been vigorously mixed is shown in burgundy (Co- $\Delta pqsL$  mixed), and  $\Delta pqsL$  with the addition of 5  $\mu$ M HQNO prior to being vigorously mixed is shown in purple (Co- $\Delta pqsL$  mixed+HQNO). Statistical significance was determined with a Mann-Whitney test with a Benjamani, Krieger and Yeekutieli correction for multiple testing. Asterisks indicate an adjusted P-value  $\leq 0.01$  in comparison to Co-WT.

**Table S1.** Strains and plasmids used in this study.

| Strain or plasmid             | Description                                                                                 | Identifier | Source or Reference |
|-------------------------------|---------------------------------------------------------------------------------------------|------------|---------------------|
| RN4220 + pHC48                | <i>S. aureus</i> RN4220 containing pHC48 which constitutively expresses dsRed               | AH3865     | (1)                 |
| LAC + pHC48                   | <i>S. aureus</i> LAC* (AH1263) + pHC48 which constitutively expresses dsRed                 | CI31       | This study          |
| LAC                           | <i>S. aureus</i> LAC* (AH1263) community-associated methicillin resistant USA300 isolate    | CI3        | (2)                 |
| PA14                          | <i>P. aeruginosa</i> strain PA14                                                            | CI132      | (3)                 |
| PA14 $\Delta pqsL$            | PA14 with <i>pqsL</i> deleted                                                               | CI136      | (4)                 |
| PA14 $\Delta phz1/2$          | PA14 with <i>phz1</i> and <i>phz2</i> deleted                                               | CI138      | (5)                 |
| PA14 Tn7::GFP                 | PA14 with <i>gfp</i> at Tn7 site                                                            | CI143      | This study          |
| PA14 $\Delta pqsL$ Tn7::GFP   | PA14 $\Delta pqsL$ with <i>gfp</i> at Tn7 site                                              | CI157      | This study          |
| PA14 $\Delta phz1/2$ Tn7::GFP | PA14 $\Delta phz1/2$ with <i>gfp</i> at Tn7 site                                            | CI154      | This study          |
| CW2-B1                        | <i>P. aeruginosa</i> strain CW2-B1                                                          | CI202      | (6)                 |
| CW2-B1 $\Delta pqsL$          | CW2-B1 with <i>pqsL</i> deleted                                                             | CI203      | This study          |
| pBK-miniTn7-gfp2              | <i>Escherichia coli</i> XL1-Blue + pBK-miniTn7-gfp2, constitutive GFP in miniTn7 transposon | AKN66      | (7)                 |
| puxBF13                       | <i>E. coli</i> S17-1 + pUXBF13, transposase plasmid to allow for integration of miniTn7     |            | (7)                 |
| pRK2013                       | <i>E. coli</i> + pRK2013, conjugative helper plasmid                                        |            | (8)                 |
| pEXG2pq                       | Plasmid for allelic replacement of <i>pqsL</i>                                              |            | (4)                 |

**Table S2.** Differential expression by RNA-seq of operons adjacent to the *pqsL* locus in murine chronic wounds infected with *P. aeruginosa* wildtype or the  $\Delta pqsL$  mutant.

| <b>Gene ID</b>    | <b>Log2 Fold-Change</b> | <b>Adjusted P-value</b> |
|-------------------|-------------------------|-------------------------|
| <i>bfiS</i>       | -0.83                   | 0.88                    |
| <i>bfiR</i>       | -0.19                   | 1.00                    |
| <i>PA14_09710</i> | 0.01                    | 1.00                    |
| <i>PA14_09730</i> | NA                      | NA                      |
| <i>PA14_09740</i> | -2.64                   | 0.16                    |
| <i>PA14_09750</i> | 0.05                    | 1.00                    |
| <i>PA14_09760</i> | -1.32                   | 0.82                    |



## SI References

1. C. B. Ibberson, C. P. Parlet, J. Kwiecinski, H. A. Crosby, D. K. Meyerholz, A. R. Horswill, Hyaluronan modulation impacts *Staphylococcus aureus* biofilm infection. *Infect. Immun.* 84, 1917-1929 (2016).
2. B. R. Boles, M. Thoendel, A. J. Roth, A. R. Horswill, Identification of genes involved in polysaccharide-independent *Staphylococcus aureus* biofilm formation. *PLoS One* 5, e10146 (2010).
3. N. T. Liberati et al., An ordered, nonredundant library of *Pseudomonas aeruginosa* strain PA14 transposon insertion mutants. *Proc. Natl. Acad. Sci. U.S.A.* 103, 2833–2838 (2006).
4. J. P. Barraza, M. Whiteley, A *Pseudomonas aeruginosa* antimicrobial affects the biogeography but not fitness of *Staphylococcus aureus* during coculture. *mBio.* 12, e00047-21 (2021).
5. L. E. P. Dietrich, A. Price-Whelan, A. Petersen, M. Whiteley, D. K. Newman, The phenazine pyocyanin is a terminal signalling factor in the quorum sensing network of *Pseudomonas aeruginosa*. *Mol. Microbiol.* 61, 1308–1321 (2006).
6. A. da Silva, "Understanding the diversity and evolution of complex wound infections" (University of Nottingham, Nottingham, UK, 2019).
7. B. Koch, L.E. Jensen, O. Nybroe, A panel of Tn7-based vectors for insertion of the *gfp* marker gene or for delivery of cloned DNA into Gram-negative bacteria at a neutral chromosomal site. *J Microbiol Methods.* 45, 187-195 (2001).
8. D. H. Figurski, D. R. Helinski, Replication of an origin-containing derivative of plasmid RK2 dependent on a plasmid function provided in trans. *Proc. Natl. Acad. Sci. U.S.A.* 76, 1648–1652 (1979).
